# Supplementary material
Source: PubMed Central journal article supplement (PMC6644259)
Supplement: ao7b00456_si_001.pdf [file ao7b00456_si_001.pdf]

## Supporting Information

# Drug-Loaded PLGA Electrospraying Porous Microspheres for the Local Therapy of Primary Lung Cancer via Pulmonary Delivery

Lifei Zhu,<sup>†,‡</sup> Miao Li,<sup>†</sup> Xiaoyan Liu,<sup>†</sup> and Yiguang Jin<sup>\*,†,‡</sup>

<sup>†</sup>Department of Pharmaceutical Sciences, Beijing Institute of Radiation Medicine, 27 Taiping Road, Beijing 100850, China, e-mail address:

jinyg@sina.com

<sup>‡</sup>Anhui Medical University, Hefei 230001, China

L.Z. and M.L. contributed equally to this manuscript.

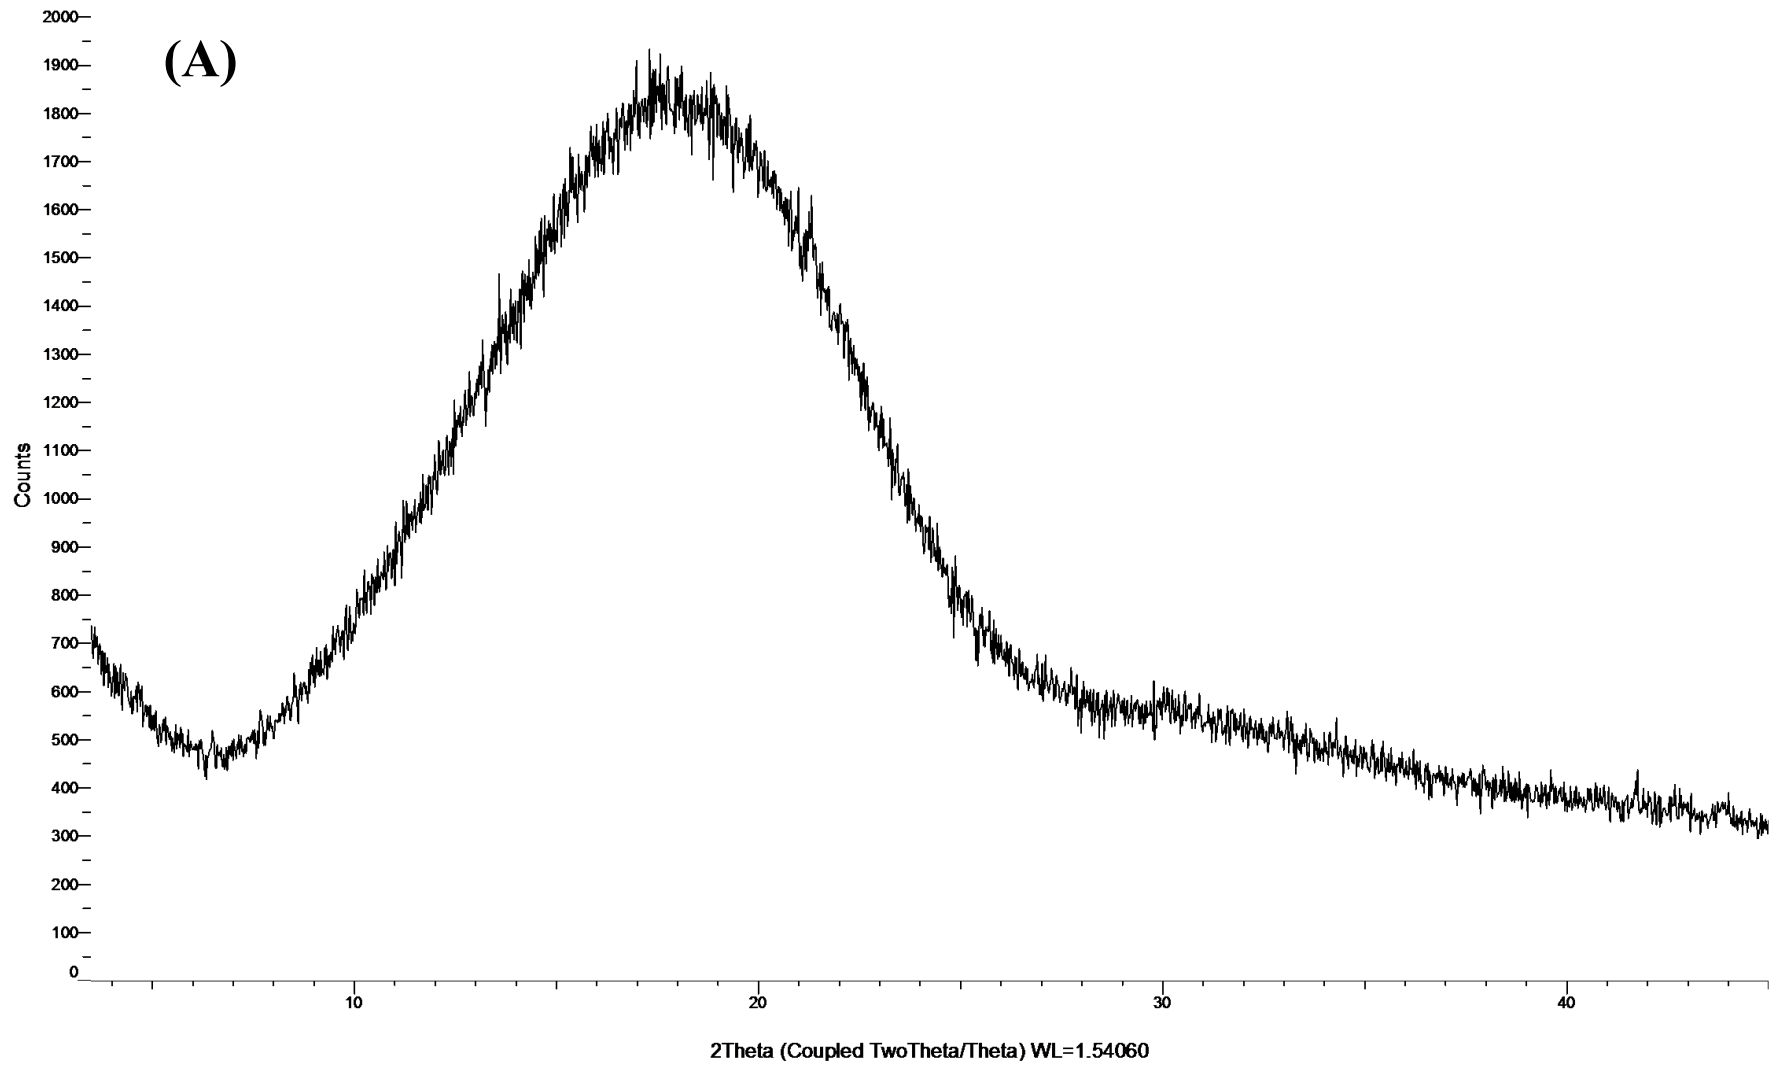

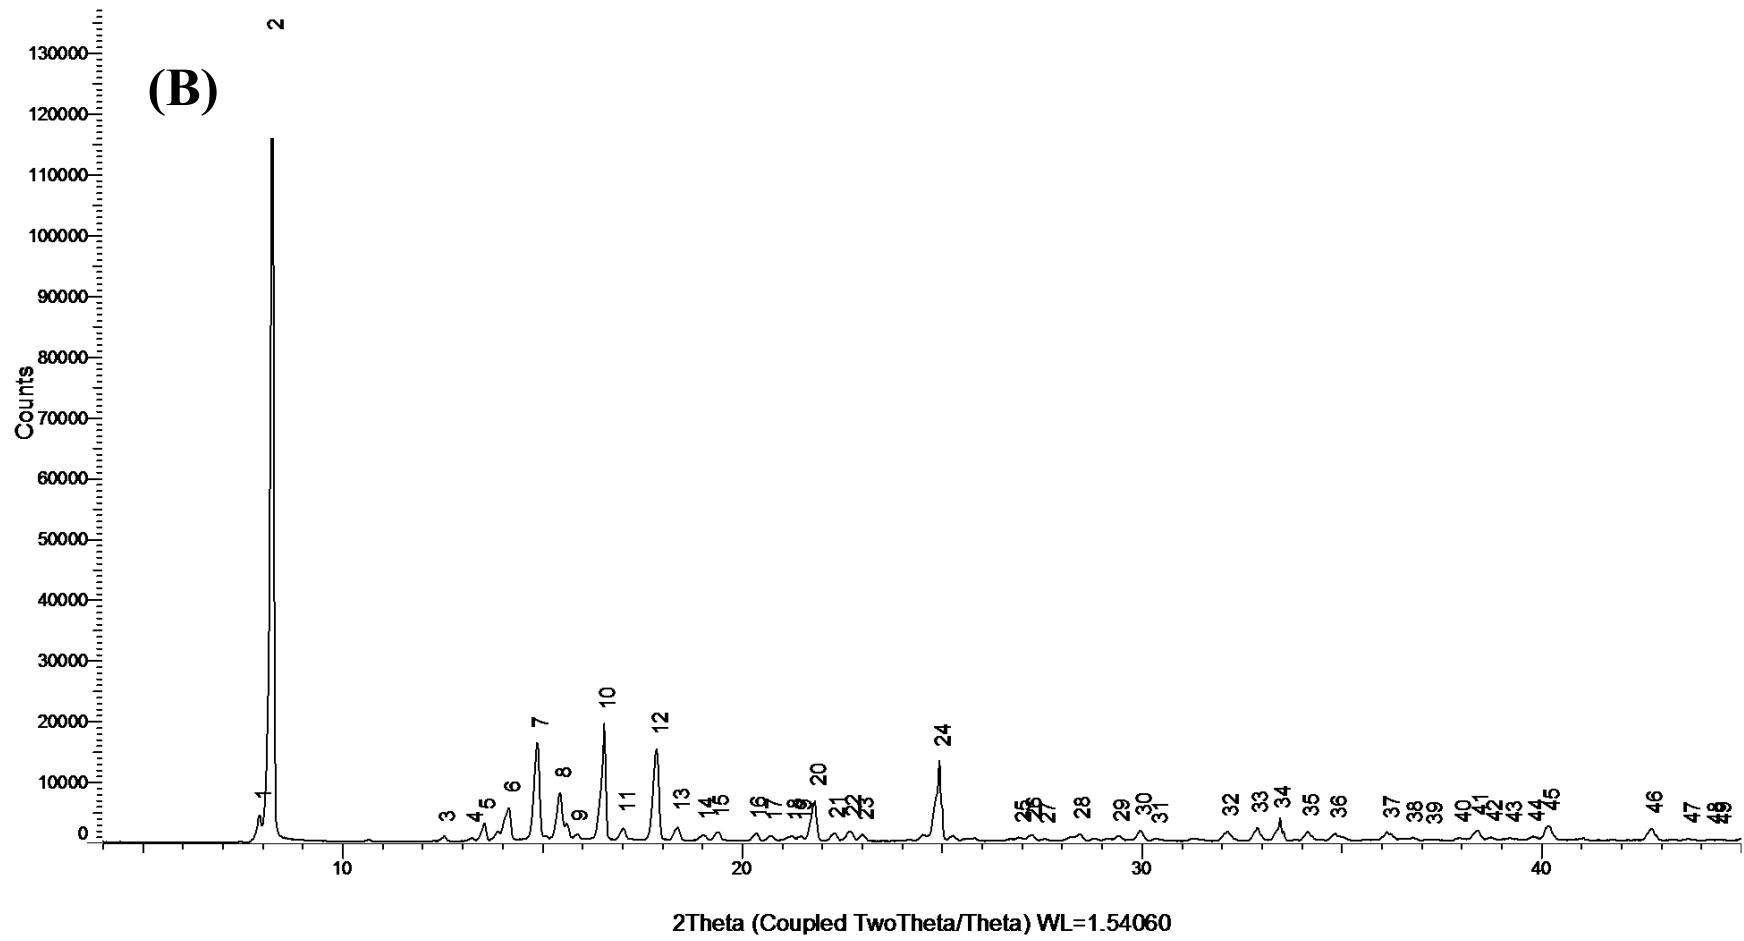

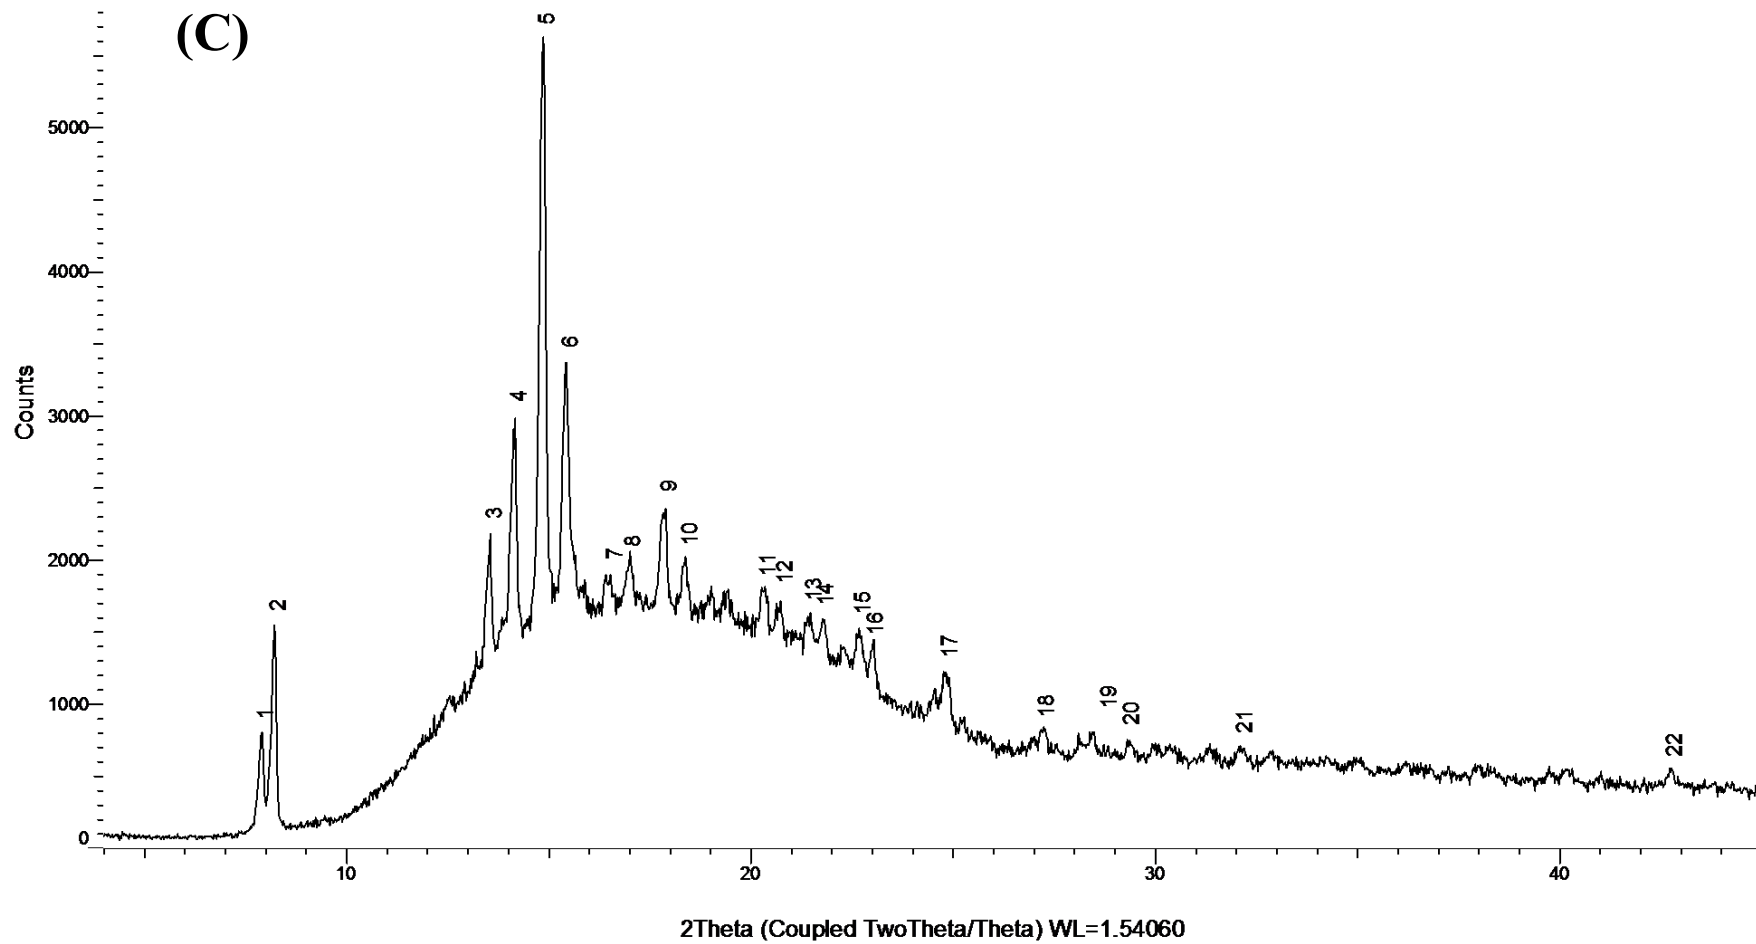

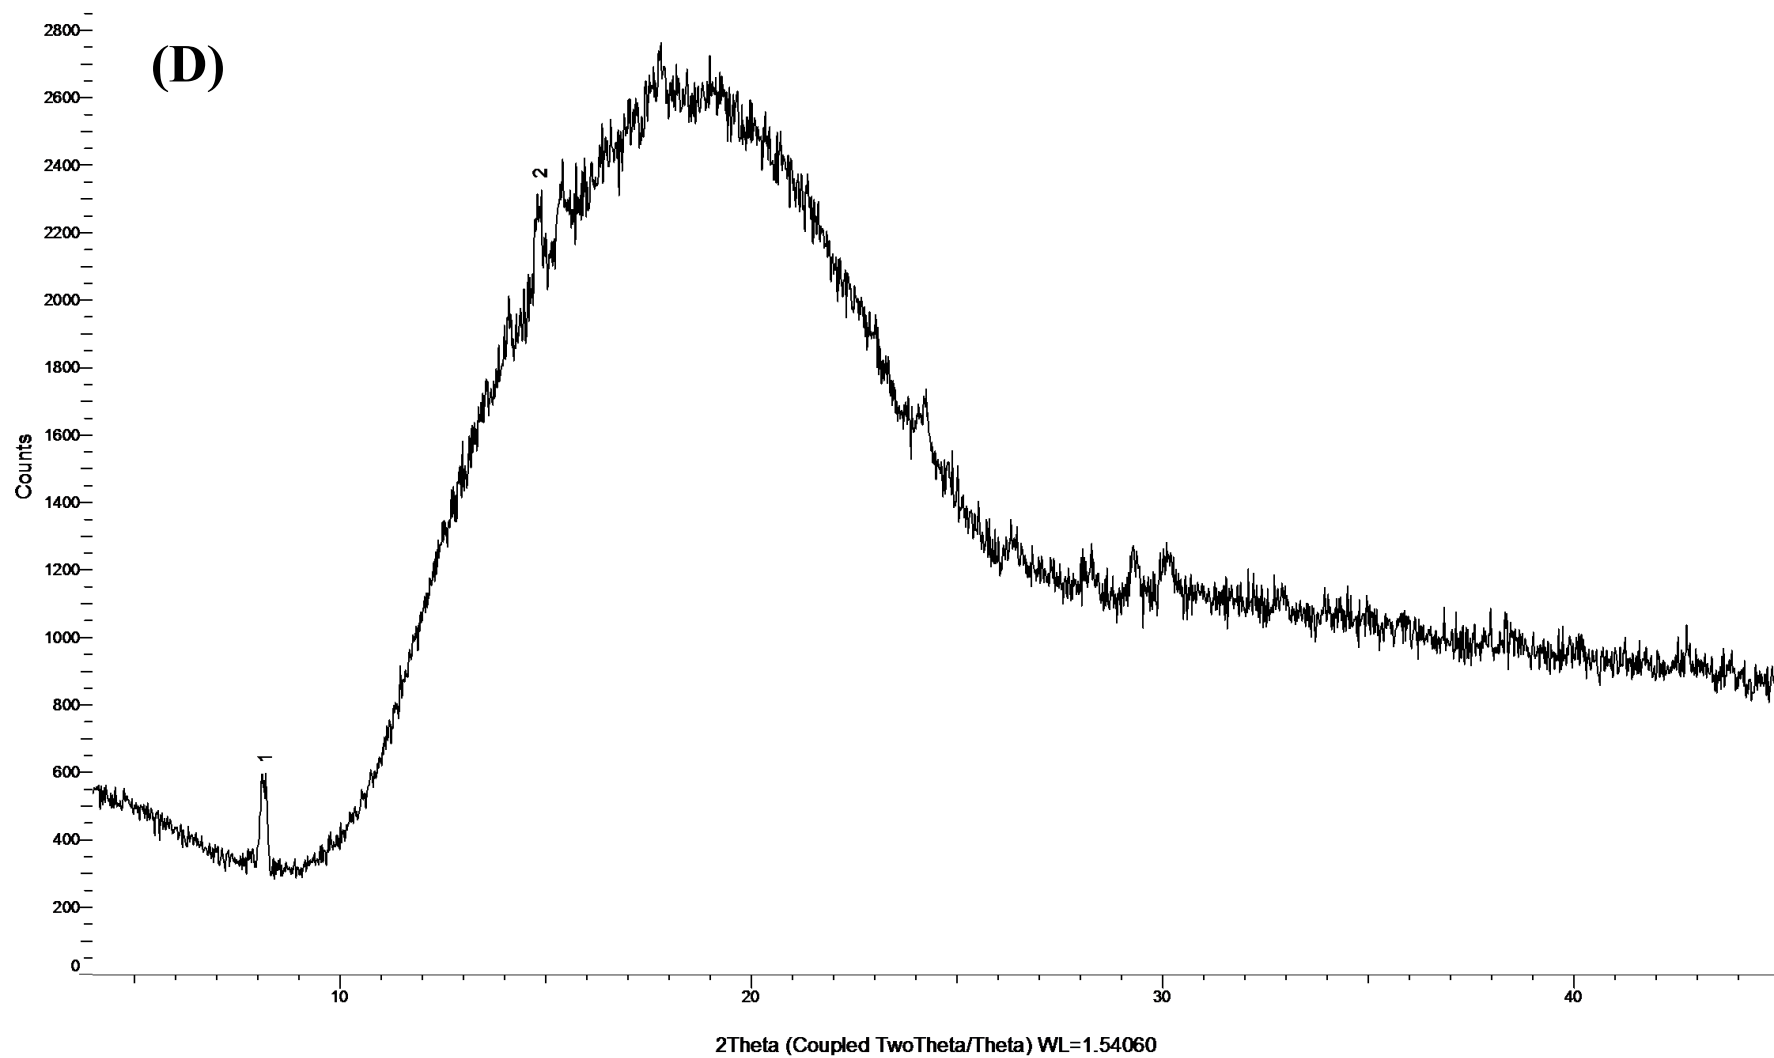

**Figure S1.** X-ray diffraction (XRD) graphs of PLGA (A), raw oridonin powders (B), the physical mixture of them (C), and the oridonin-loaded PLGA EPMs (D).

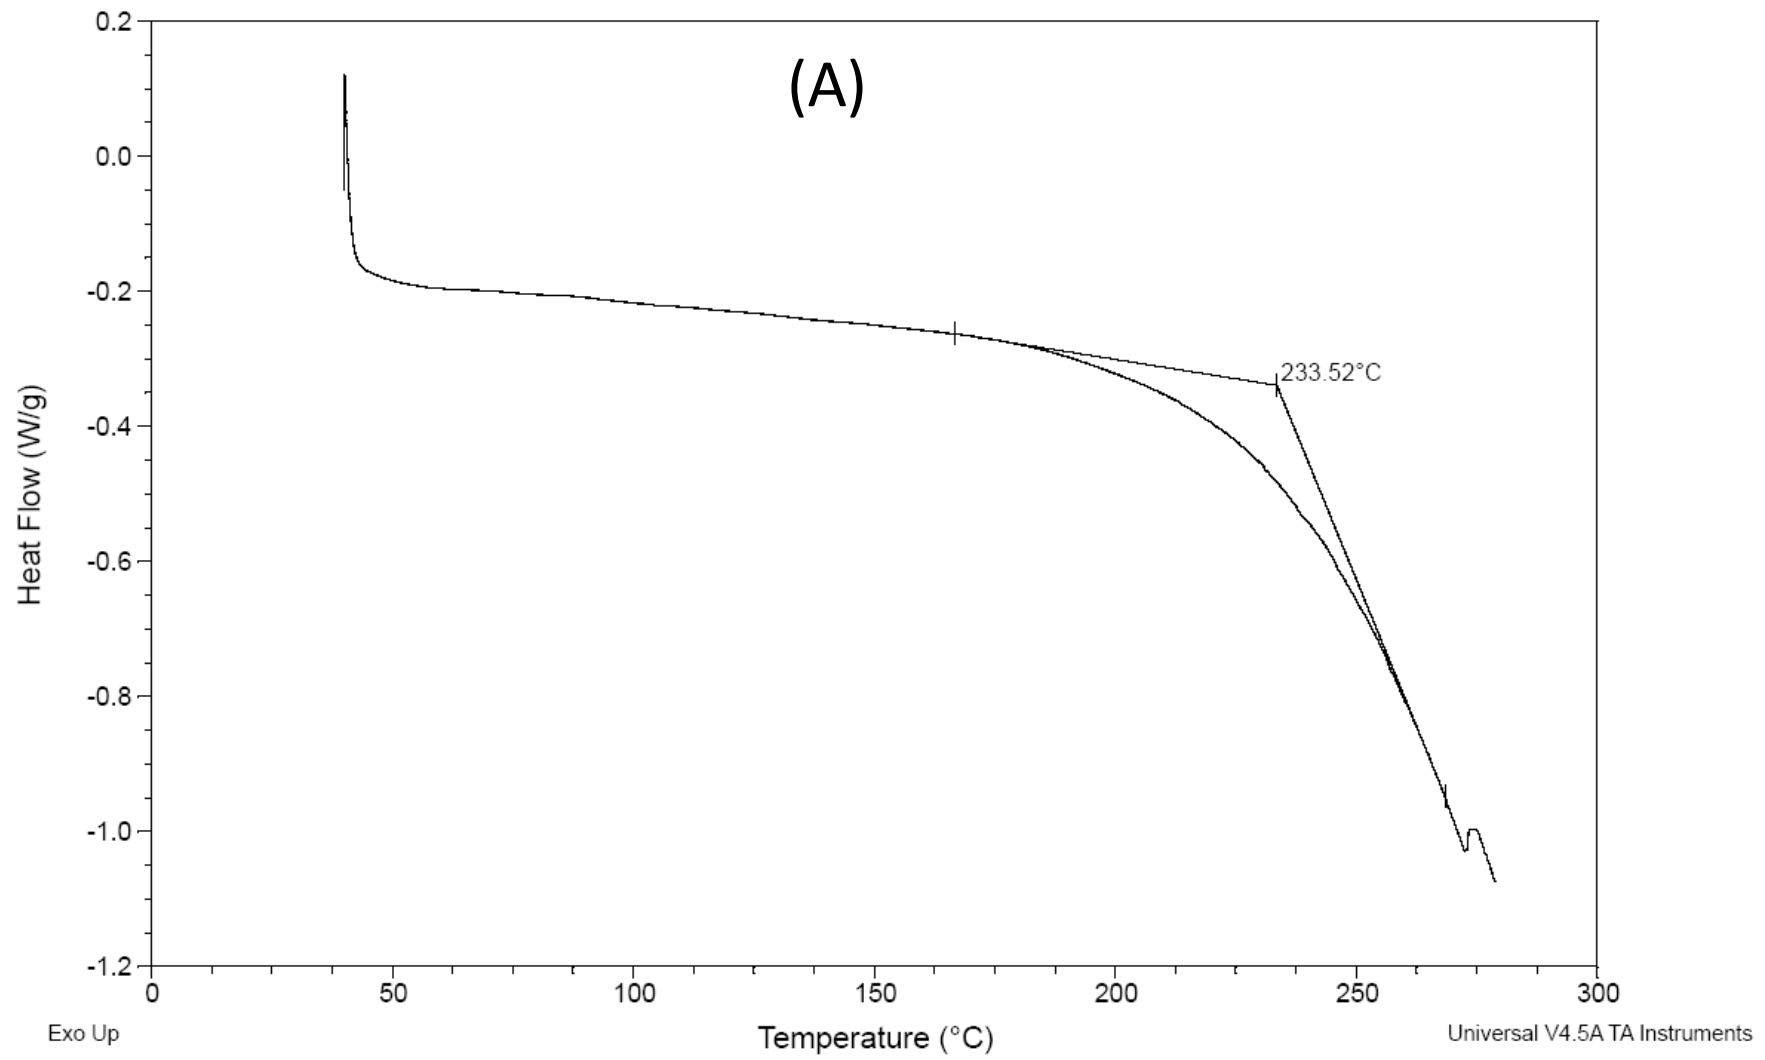

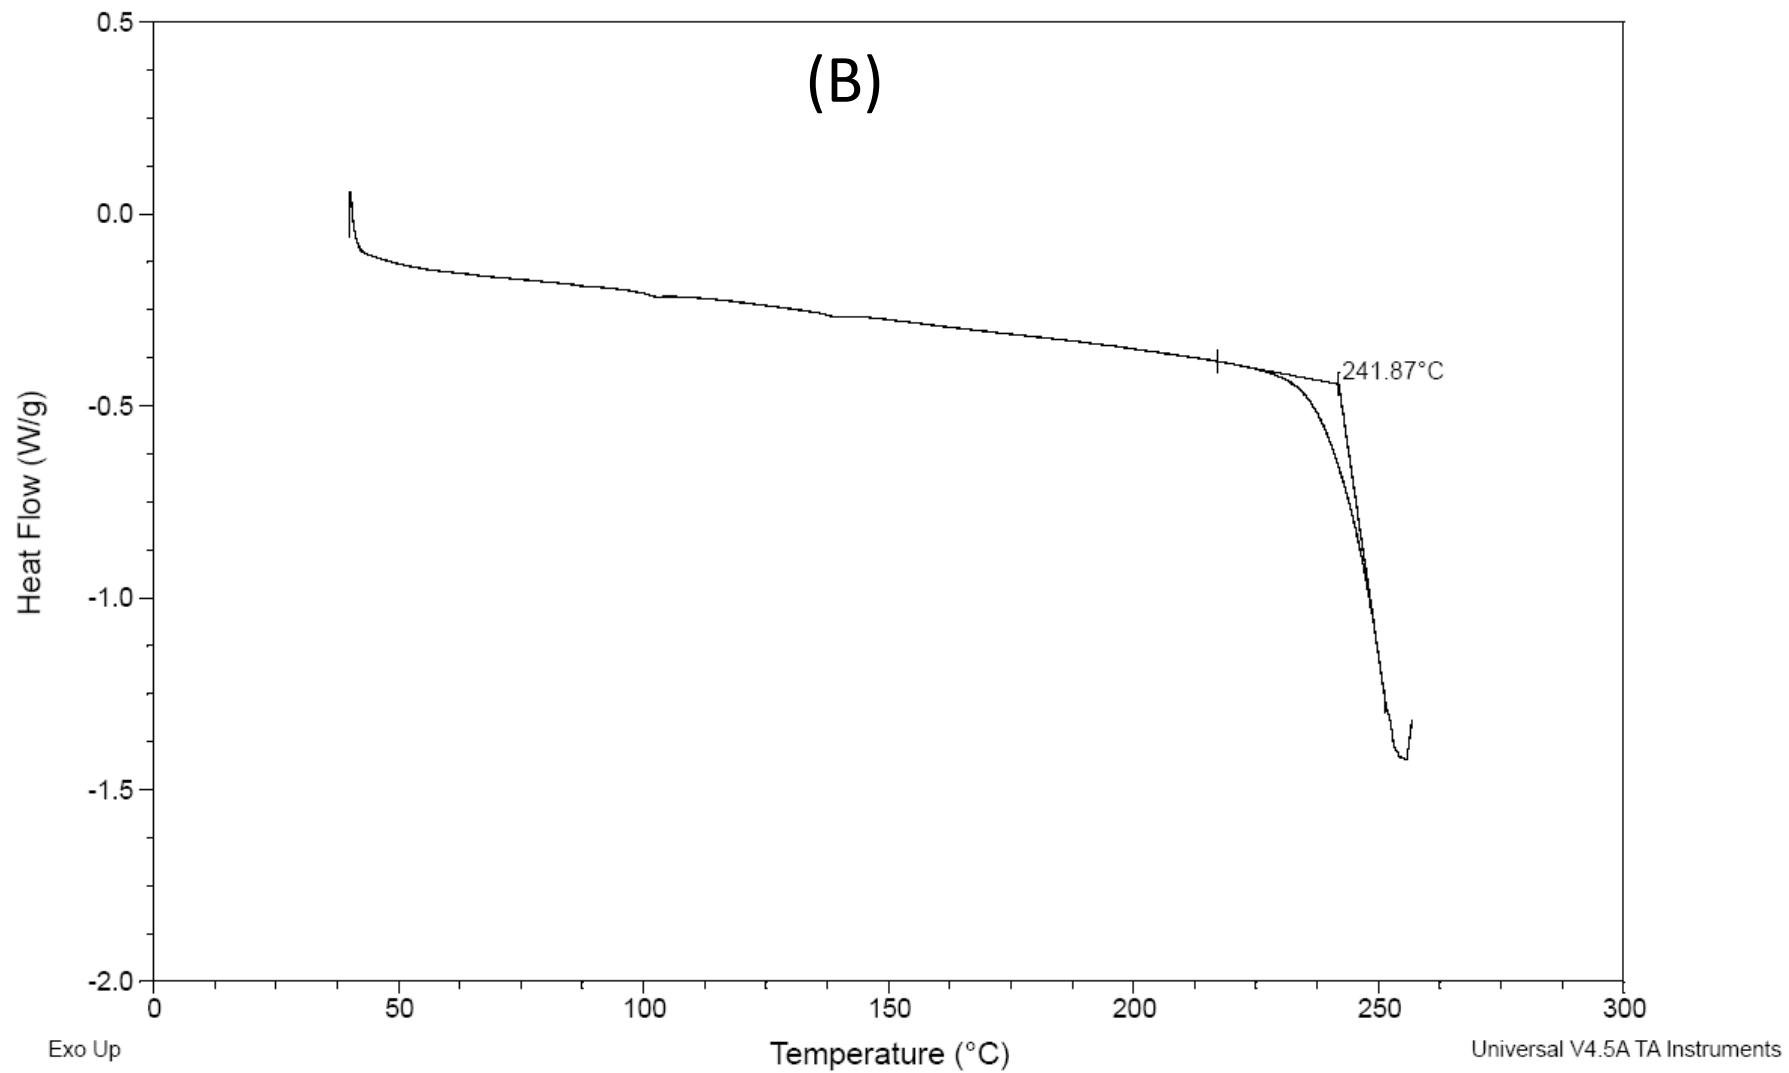

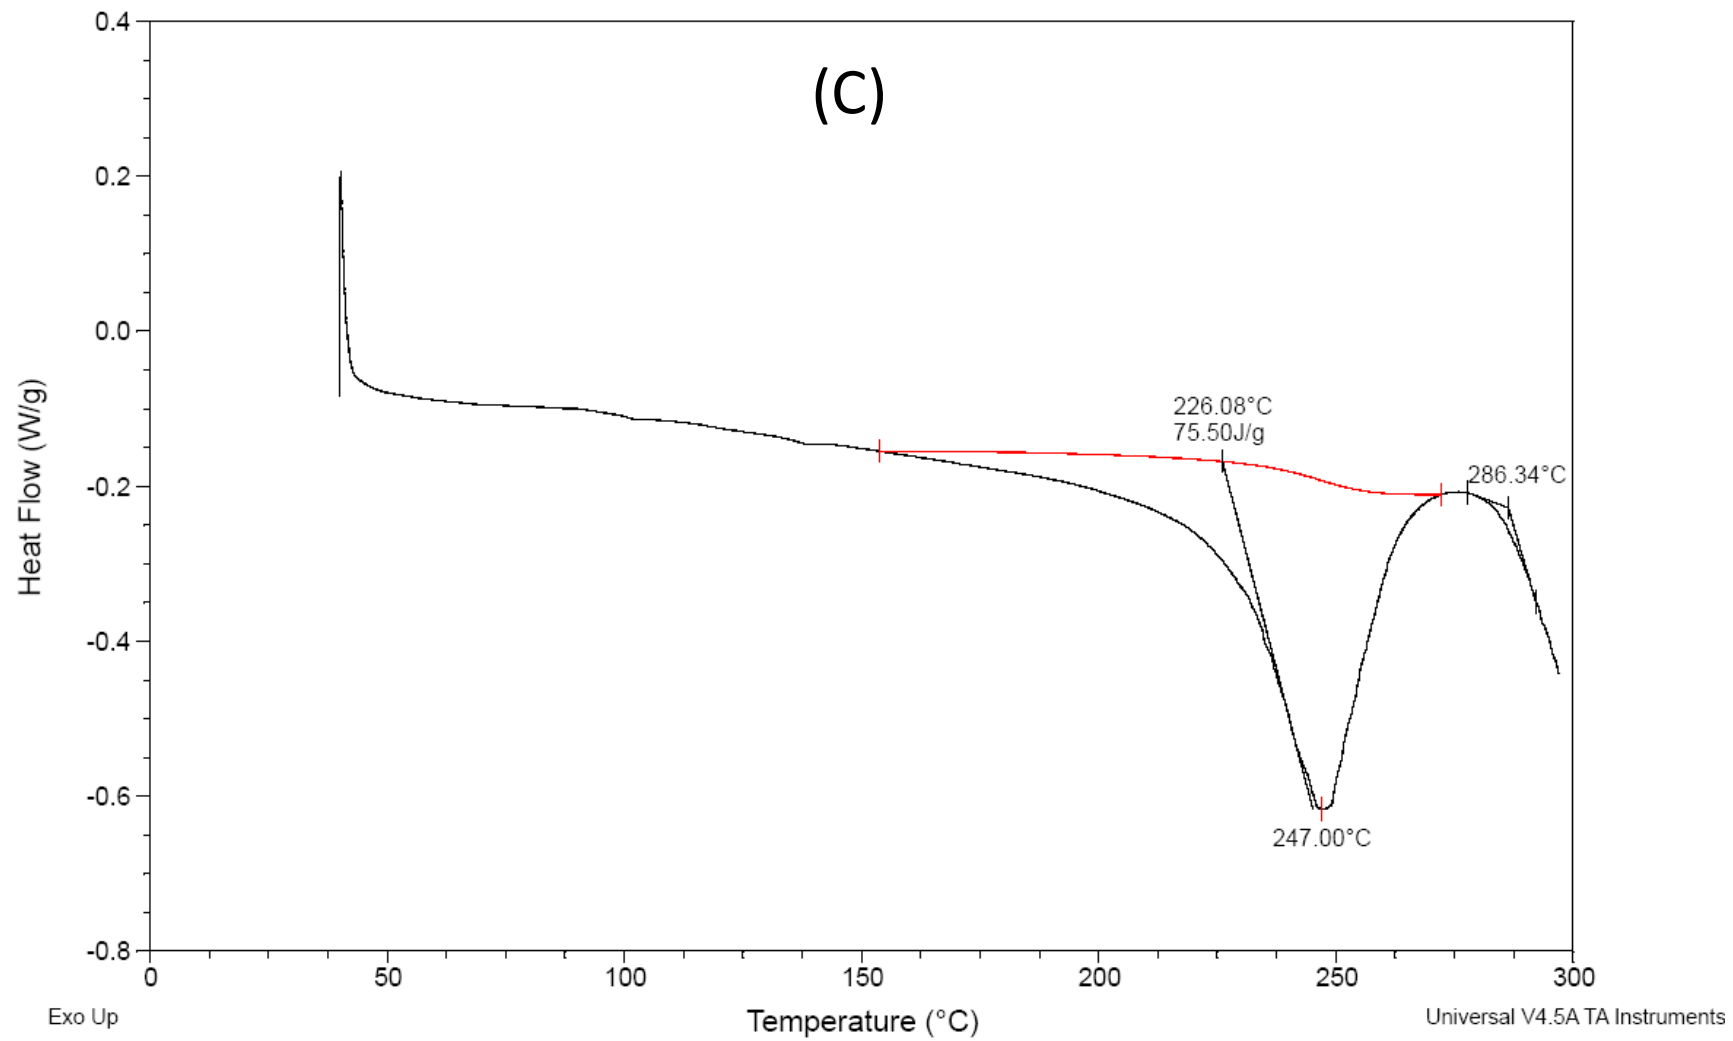



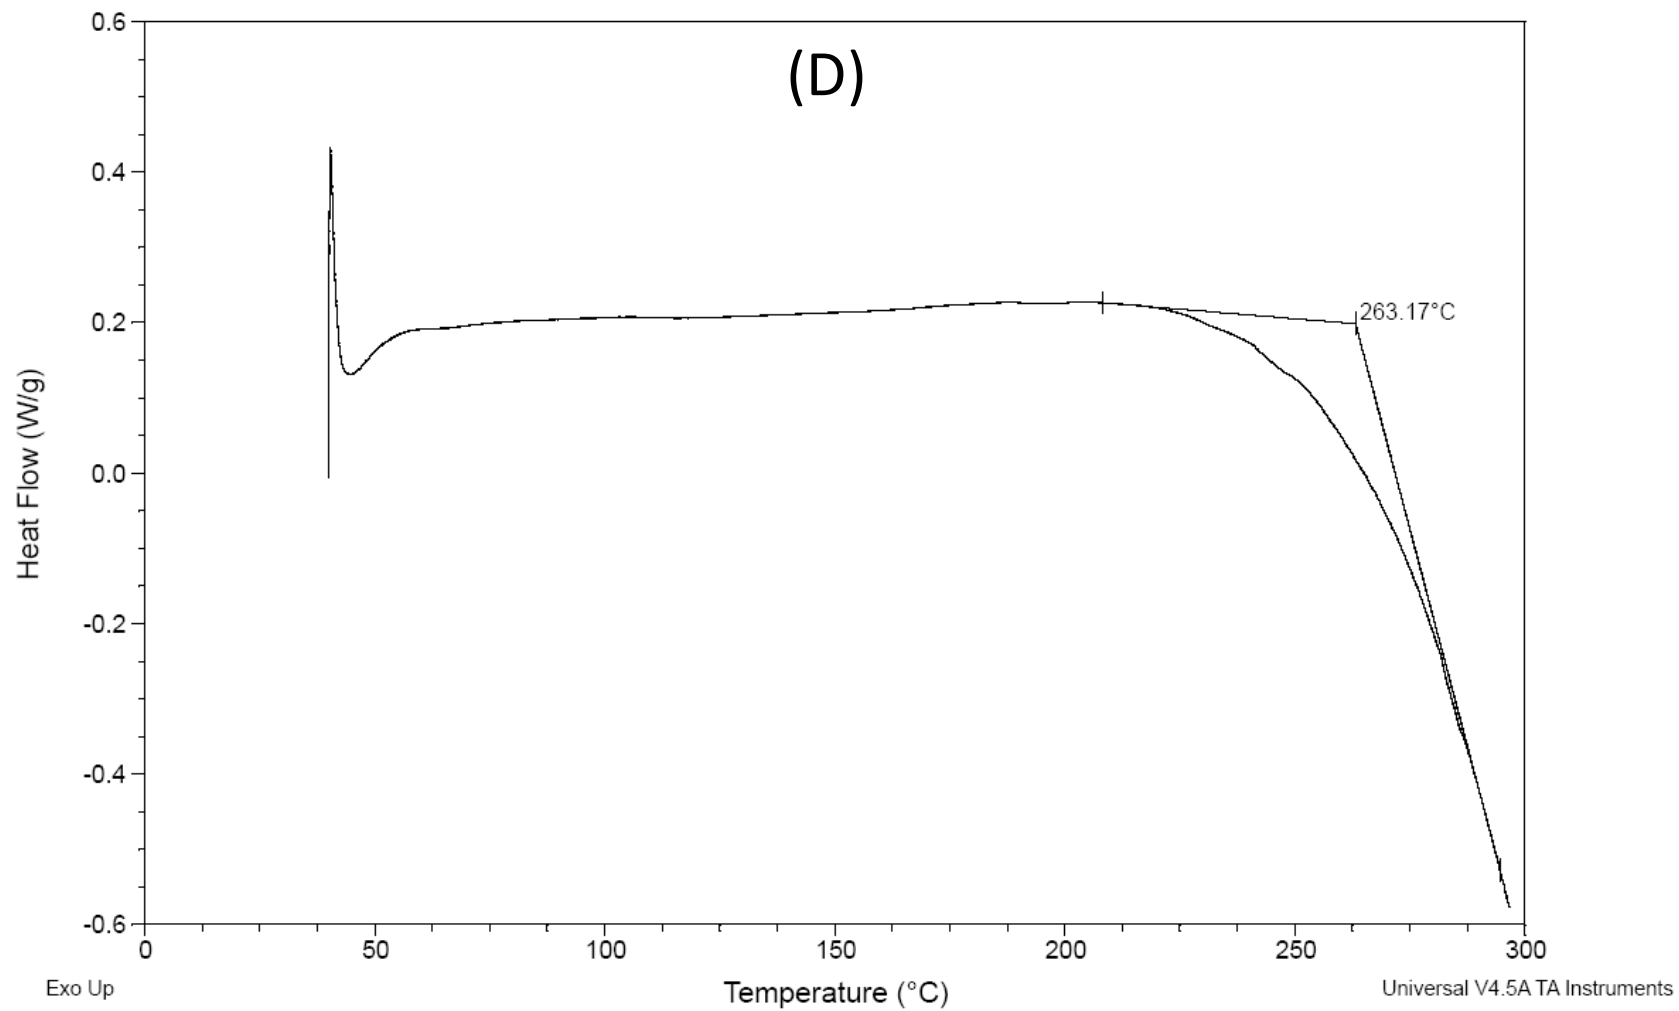

**Figure S2.** Differential scanning calorimetric (DSC) graphs of PLGA (A), raw oridonin powders (B), the physical mixture of them (C), and the oridonin-loaded PLGA EPMs (D).

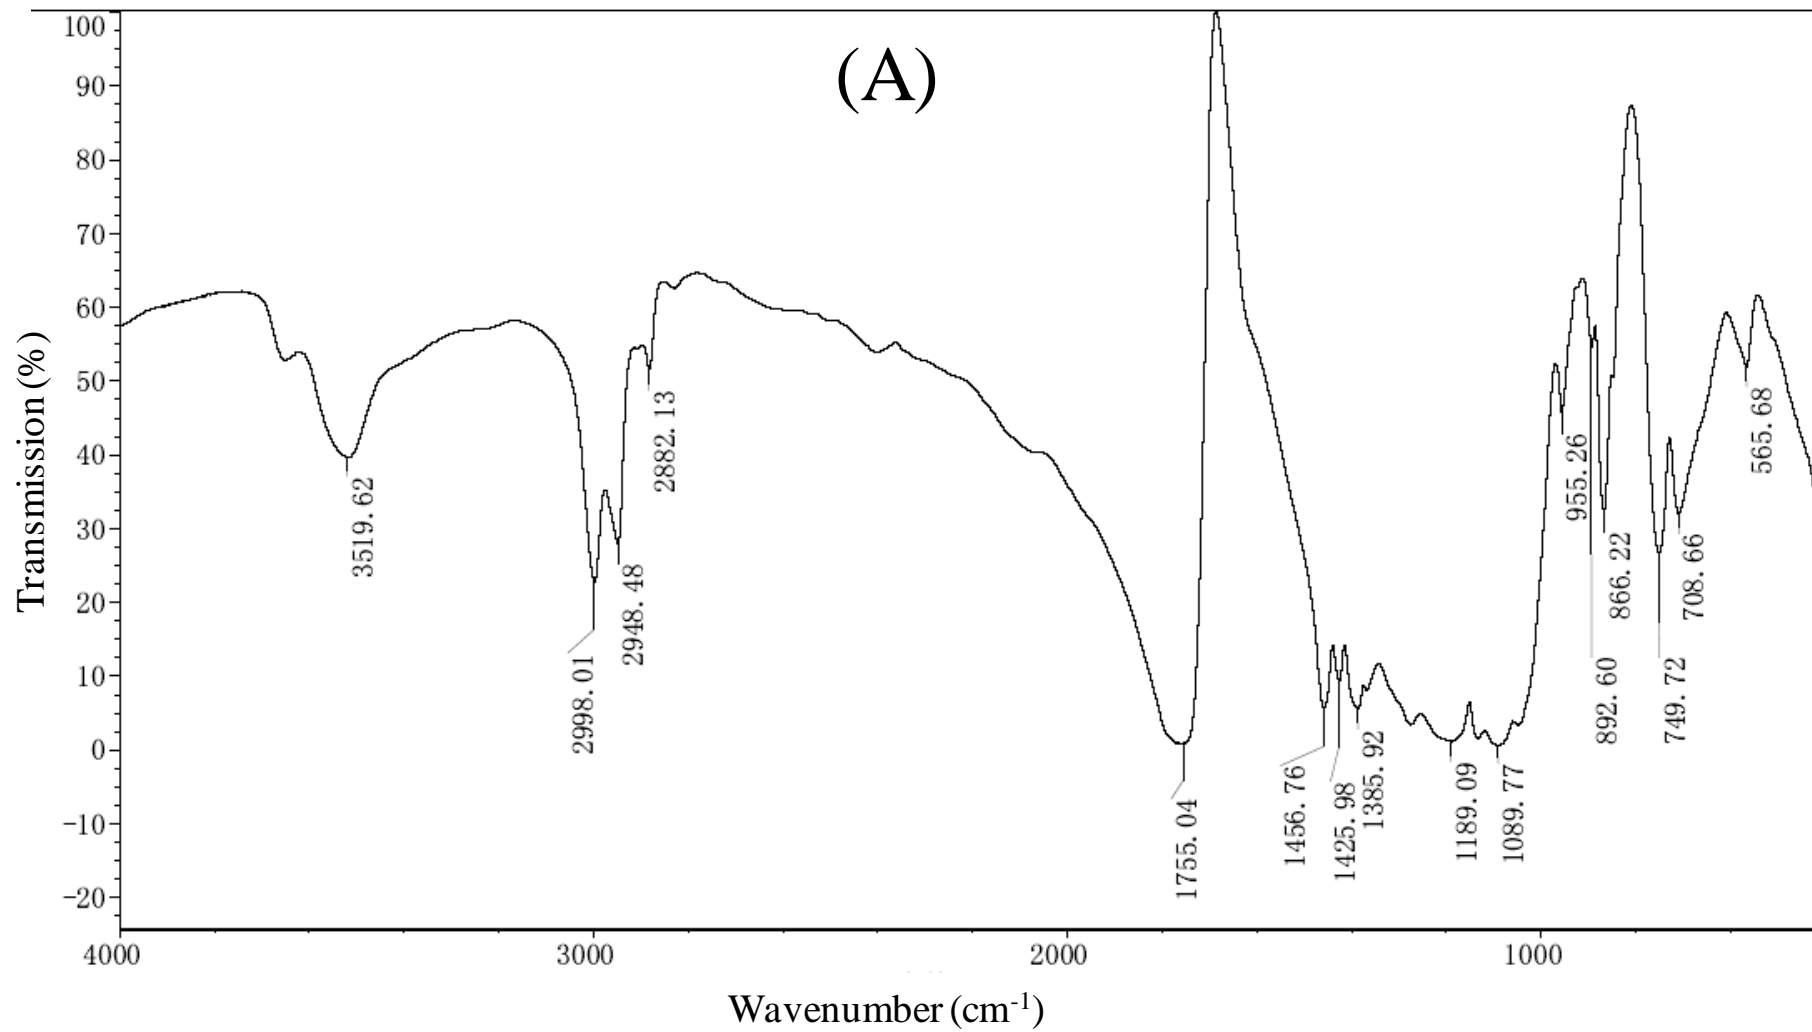

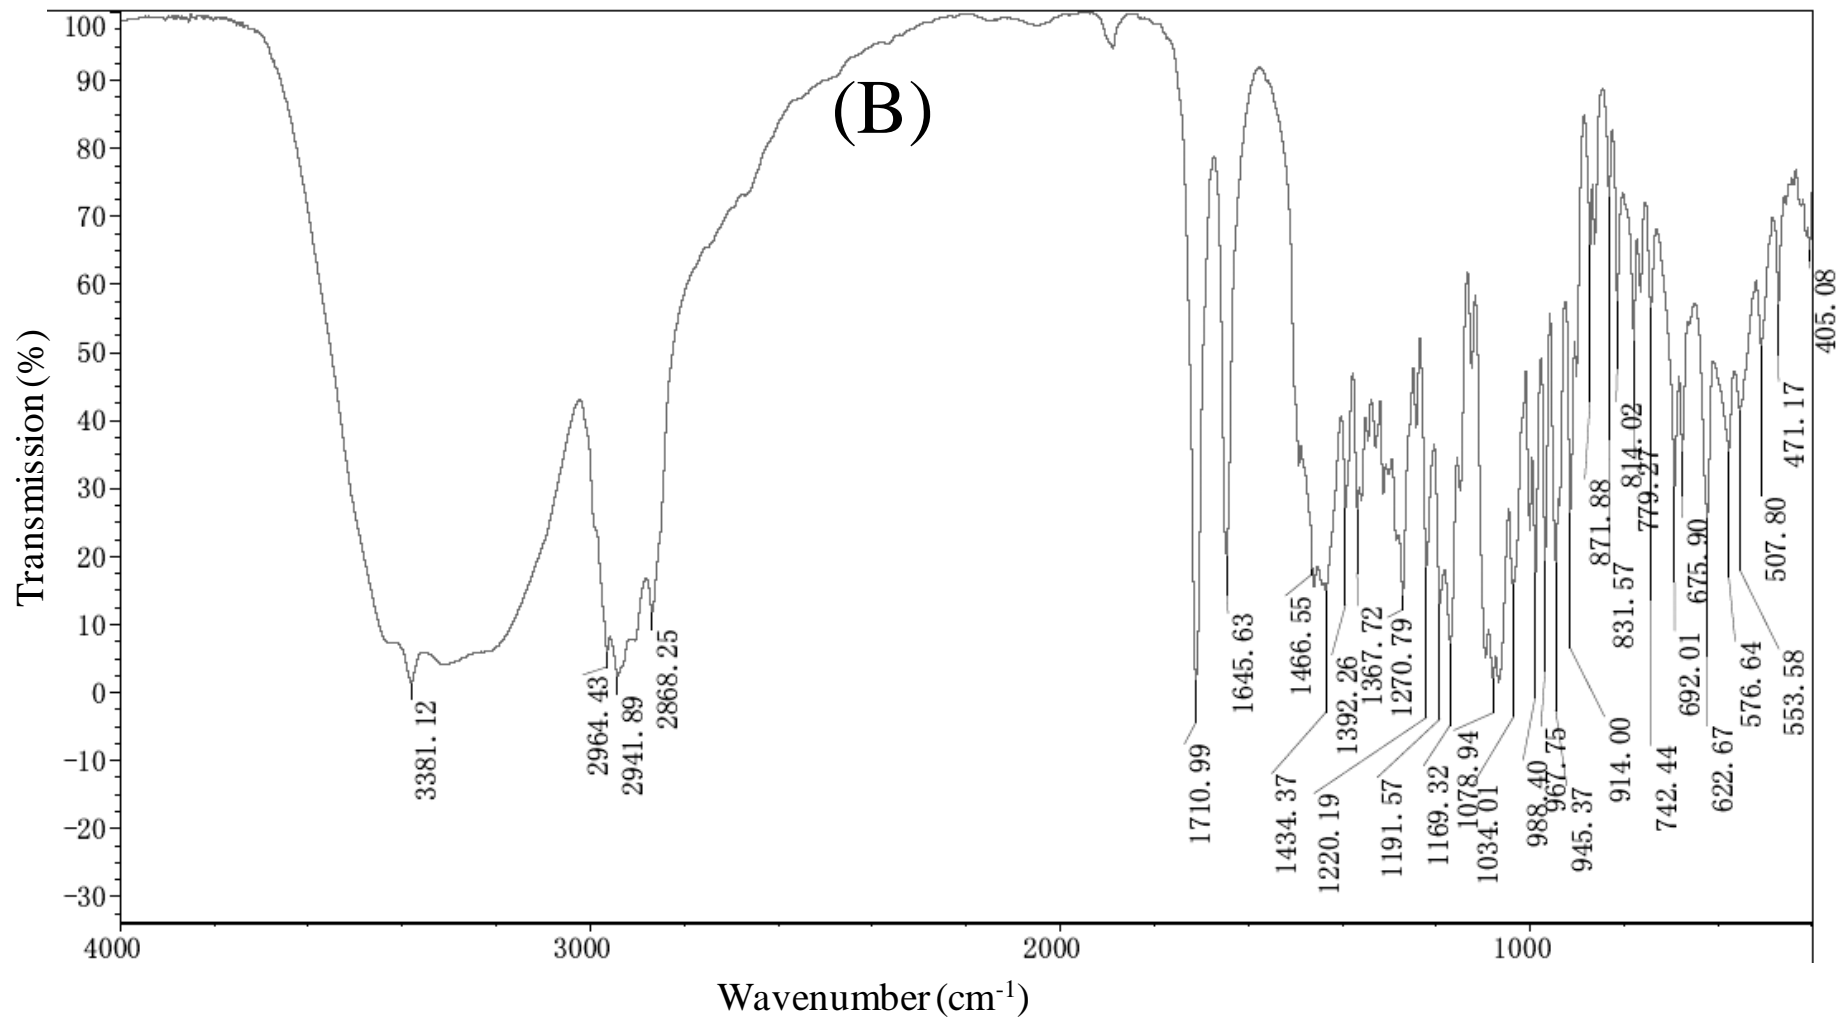

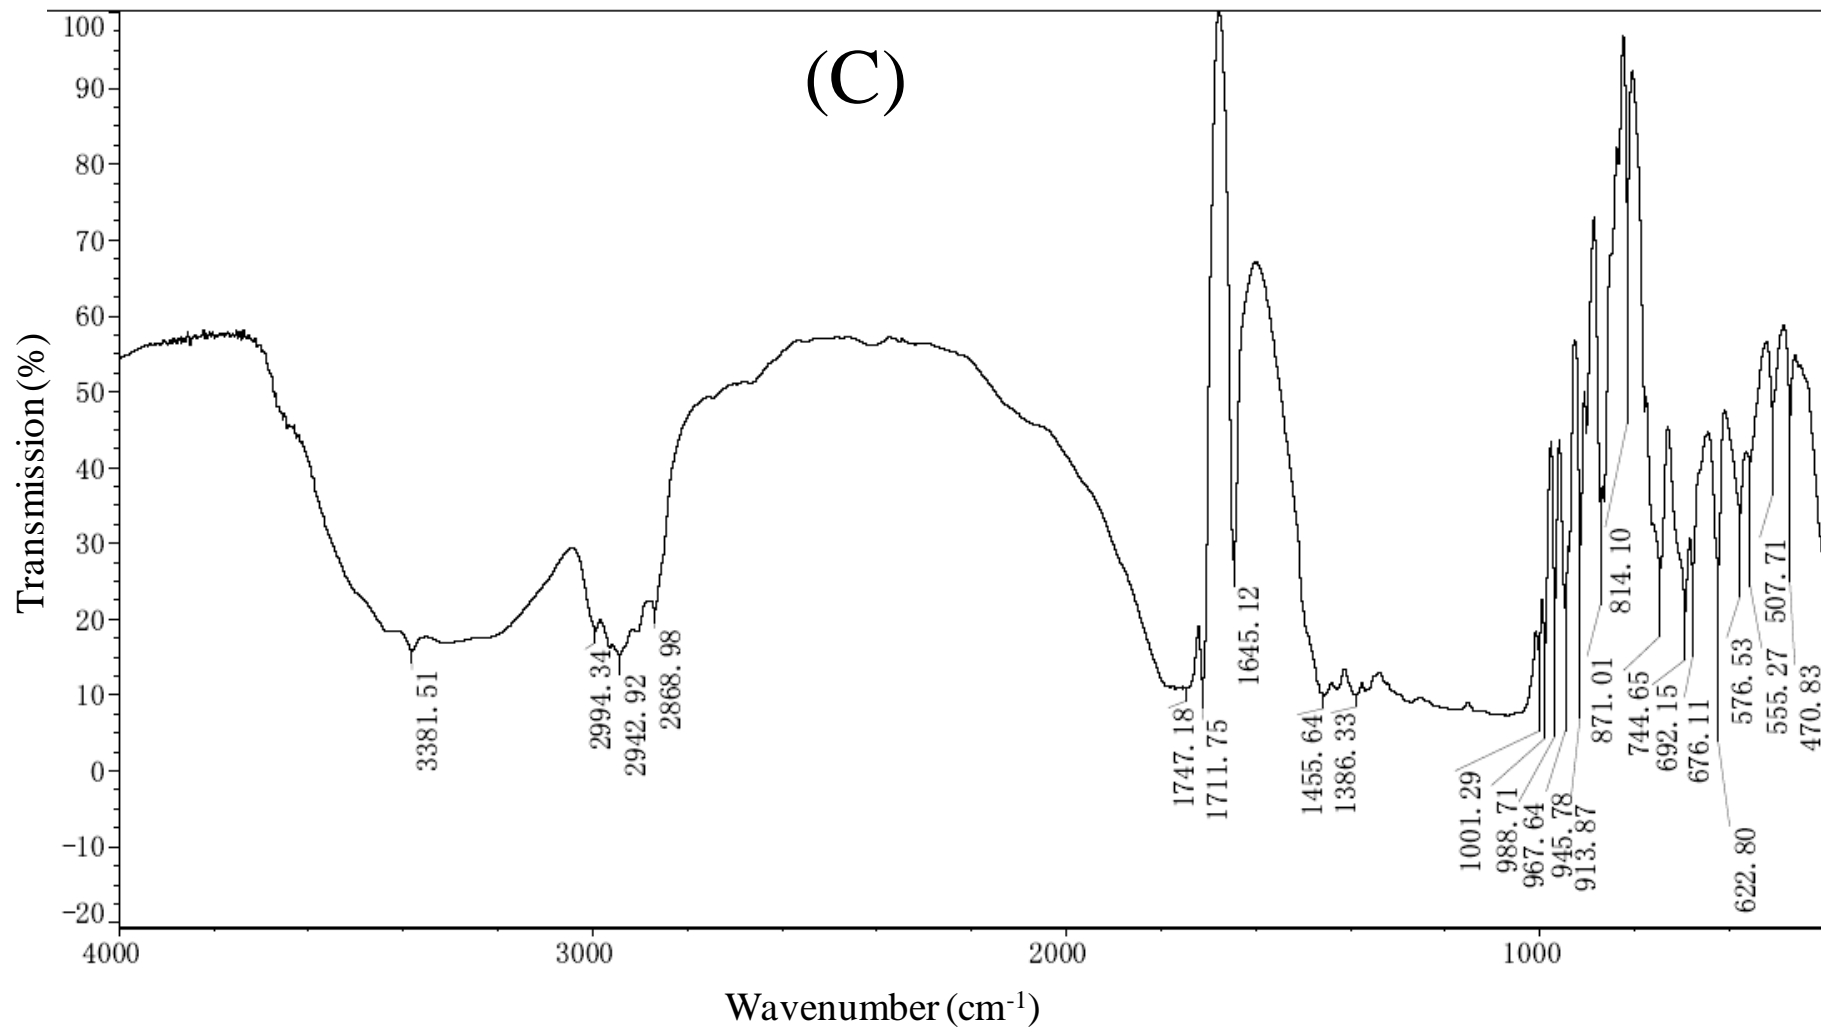

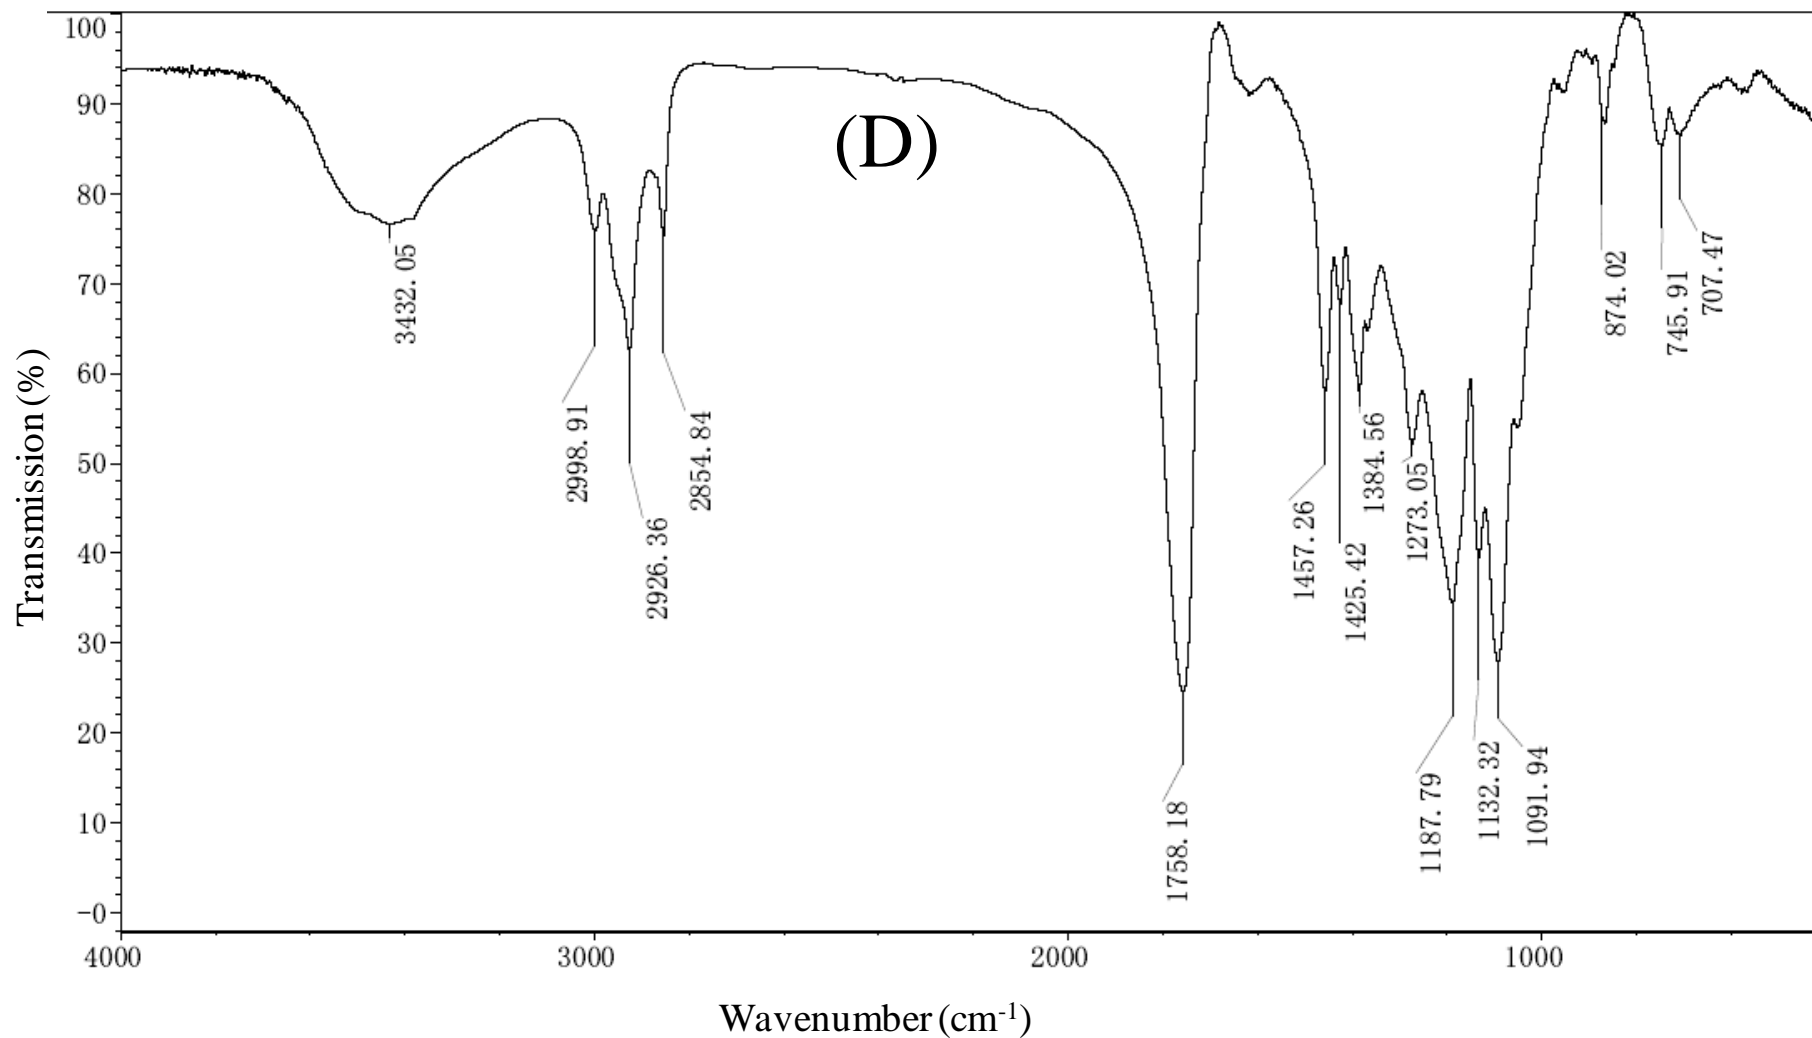

**Figure S3.** Infrared (IR) spectra of PLGA (A), raw oridonin powders (B), the physical mixture of them (C), and the oridonin-loaded PLGA EPMS (D).

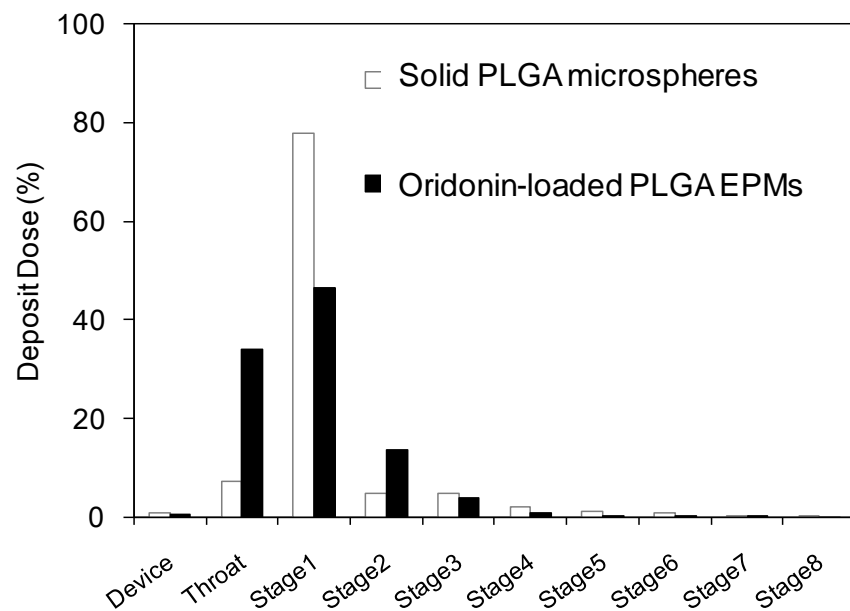

**Figure S4.** *In vitro* distribution of non-porous oridonin-loaded solid PLGA microspheres and oridonin-loaded PLGA EPMS using the NGI. The stage numbers indicate the deposition site of lung. Higher numbers indicate the deeper deposition sites. Generally, Stages 2~8 indicate effective lung deposition.
